# Supplementary material for: Recombinant TAT-Thymosin β-4 Promotes Angiogenesis by Activating VEGFR2 Signaling Pathway
Source: Research Square preprint supplement (doi:10.21203/rs.3.rs-913761/v1), 2021-09-27
Supplement: Supplementary file 1 [file 6a013310180526ce628a89e6.docx]

Supplementary informations

**Recombinant TAT-Thymosin β-4 promotes angiogenesis by activating VEGFR2 Signaling pathway**

Chul Min Kim1,§, Yun-Mi Jeong2,§, Jae-Hun Kim2, Guolong Jin2, Jung Seok Kim3, Dal Yong Park3, Songwan Jin2, Jin-hyung Shim2, Won-soo Yun2, Seokhwan Yun2,*

***** Correspondence: yuntobi@kpu.ac.kr(S.Y) ; Tel.:+82-31-8041-1819

§ These authors contributed equally to this work.

**Original Images of Western blotting**

| Figure 4a  t-VEGFR2  Primary antibody – Sigma, Cat# SAB4501645  Titer – 1:1000 in 3% TBST | 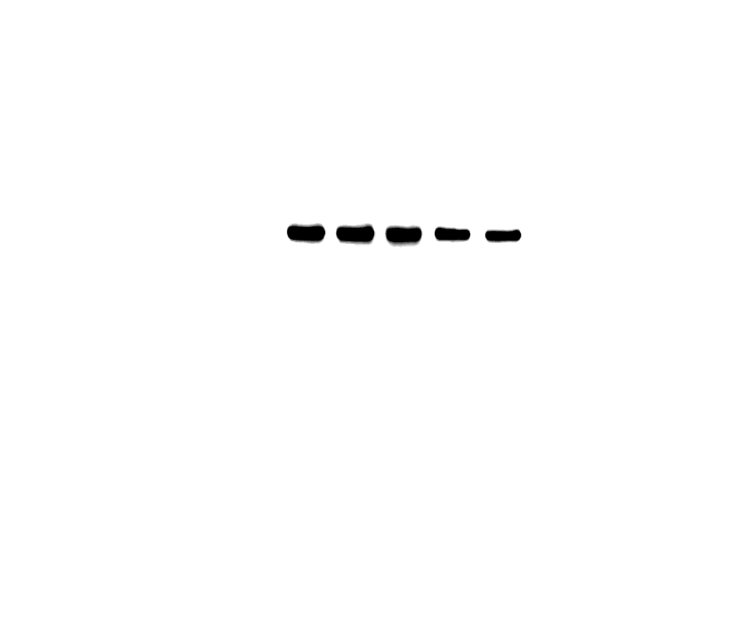 |
| --- | --- |
| Figure 4a  p-VEGFR2  Primary antibody – Merk, Cat# PS1013  Titer – 1:1000 in 3% TBST | 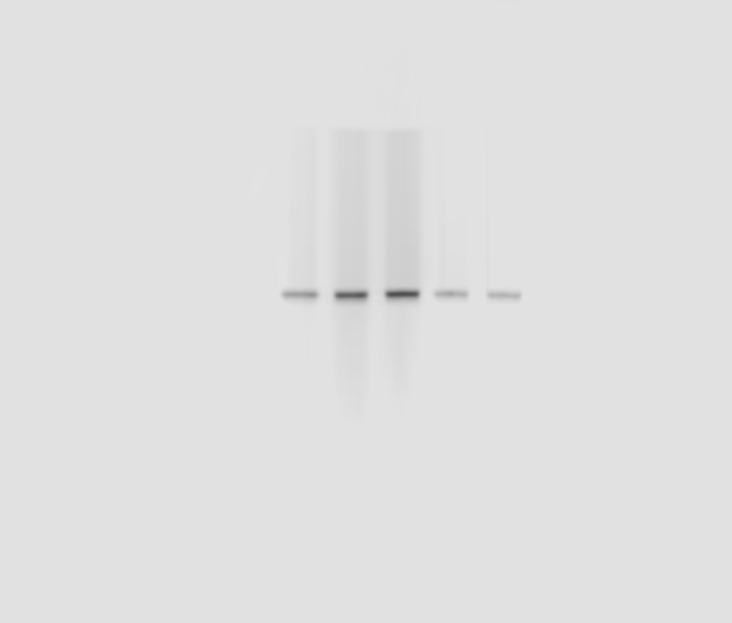 |

| Figure 4a  Ang1. Primary antibody  Millipore, Cat# AB3120  Titer – 1:1000 in 3% TBST  Ang2. Primary antibody  Millipore, Cat# AB3121  Titer – 1:1000 in 3% TBST | 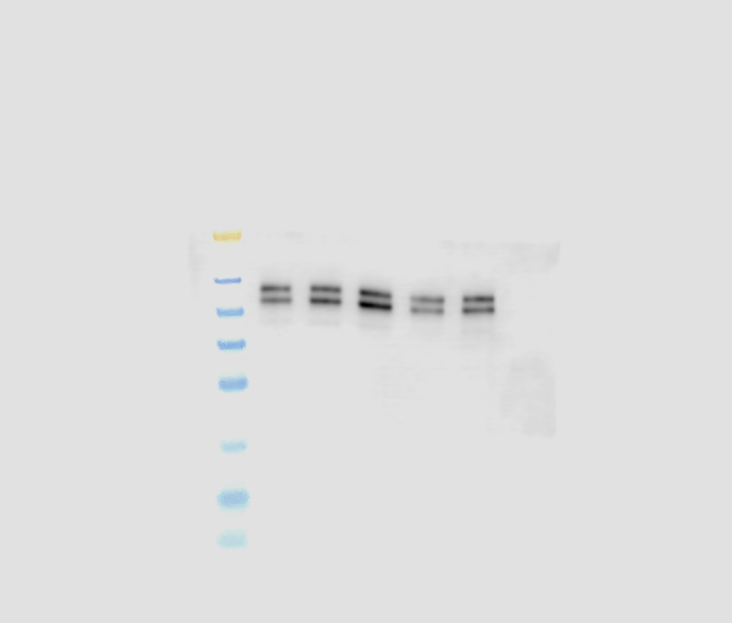 |
| --- | --- |
| Figure 4a  Beta actin  Primary antibody – Sigma, Cat# A5441  Titer – 1:5000 in 3% TBST | 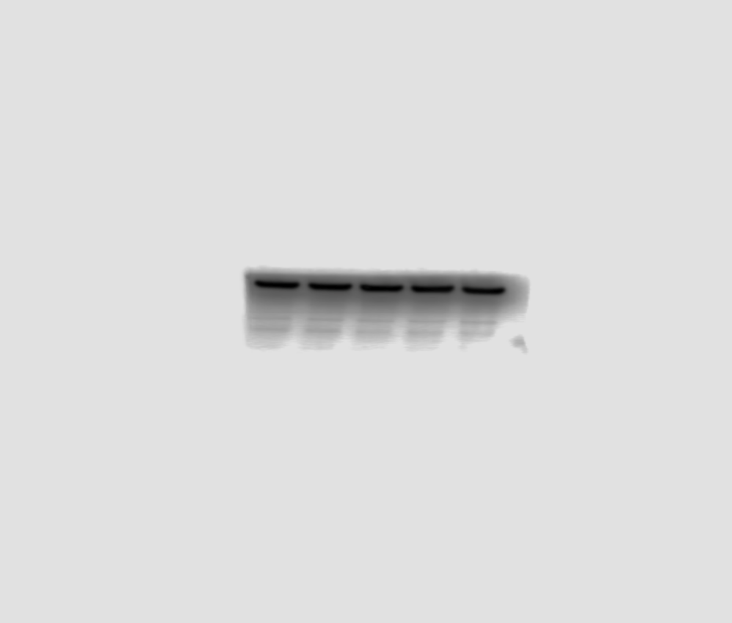 |
| Figure 5a  VEGFa  Primary antibody – Santacruz, Cat# sc7269  Titer – 1:1000 in 3% TBST | 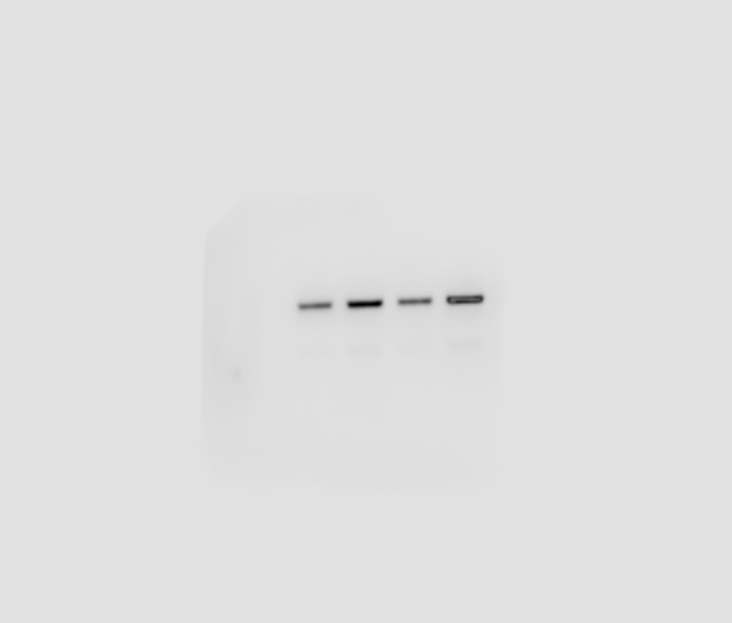 |

| Figure 5a  Ponceau S staining  Standard for cell culture media protein because cell culture media contains no beta actin | 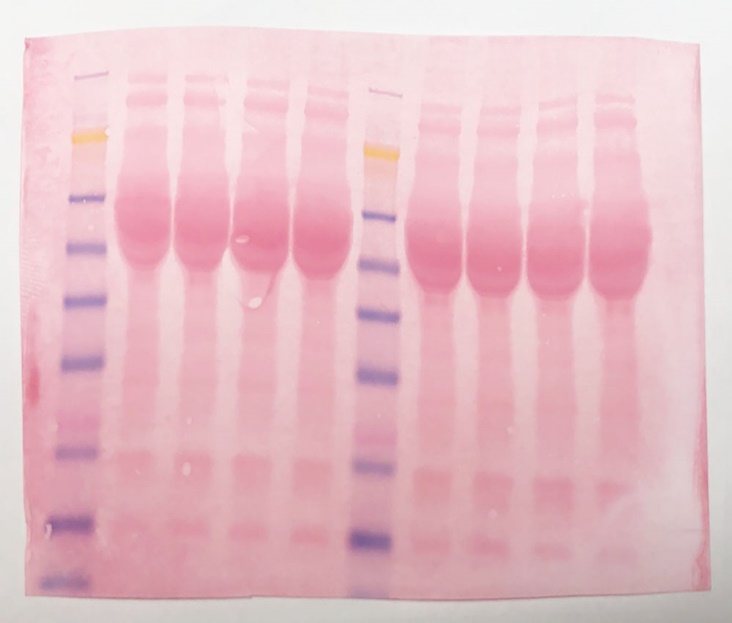 |
| --- | --- |
| Figure 5b  VEGFa  Primary antibody – Santacruz, Cat# sc7269  Titer – 1:1000 in 3% TBST | 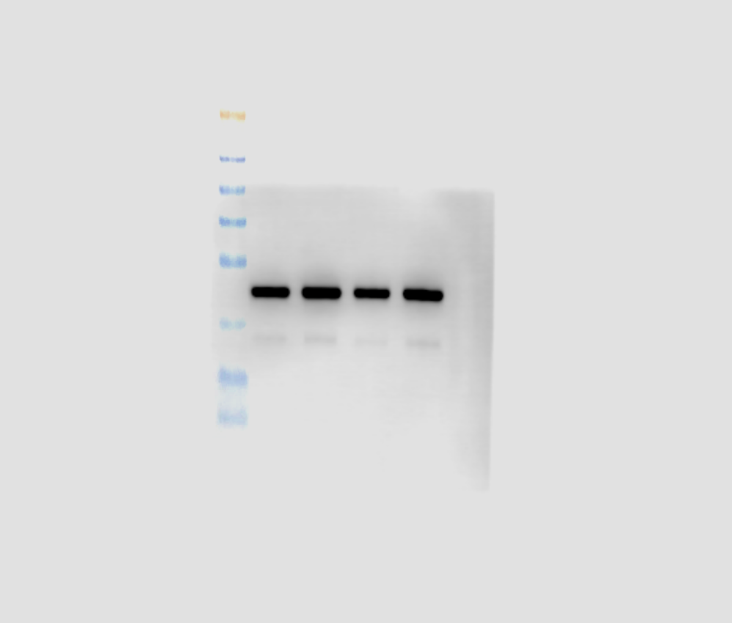 |
| Figure 5b  p-VEGFR2  Primary antibody – Merk, Cat# PS1013  Titer – 1:1000 in 3% TBST | 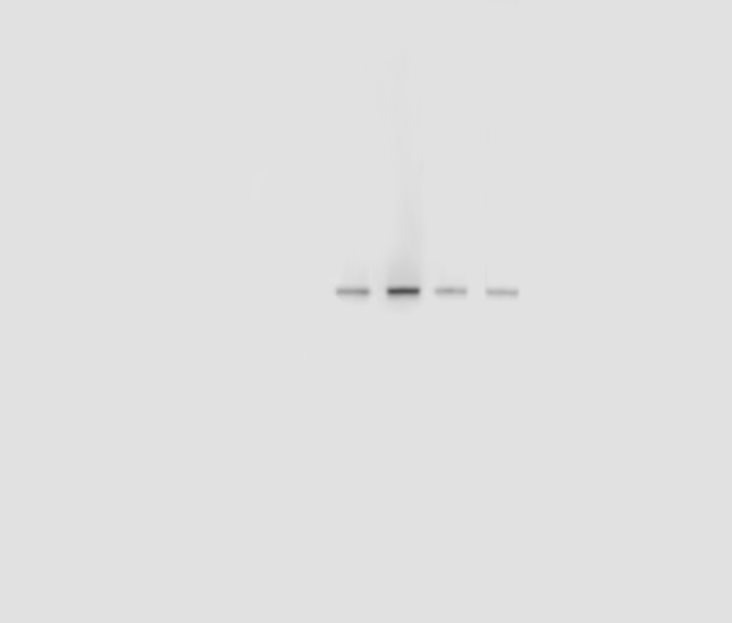 |

| Figure 5b  t-VEGFR2  Primary antibody – Sigma, Cat# SAB4501645  Titer – 1:1000 in 3% TBST | 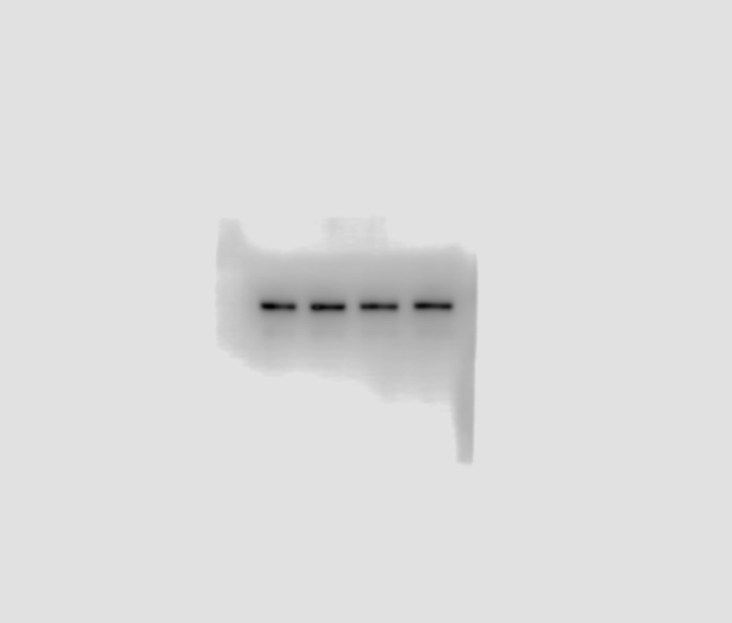 |
| --- | --- |
| Figure 5b  p-AKT  Primary antibody – CST, Cat# 9272  Titer – 1:1000 in 3% TBST | 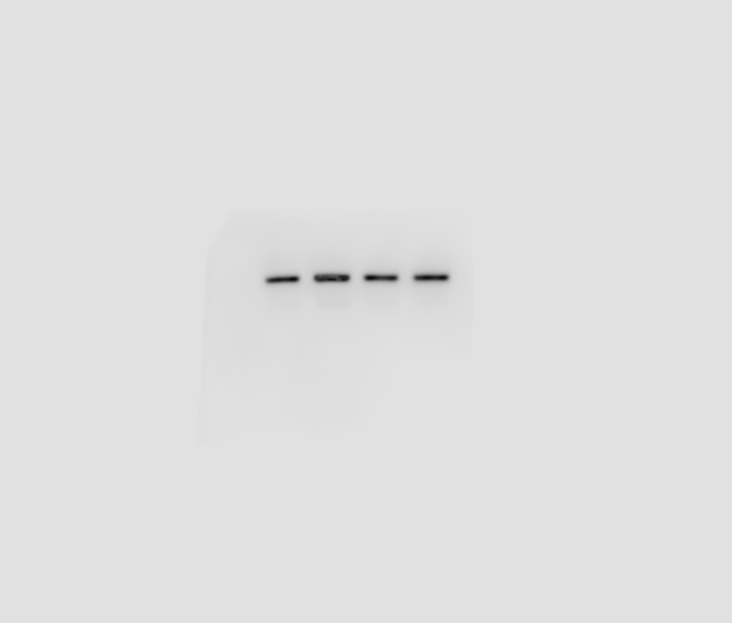 |
| Figure 5b  p-AKT  Primary antibody – CST, Cat# 9271  Titer – 1:1000 in 3% TBST | 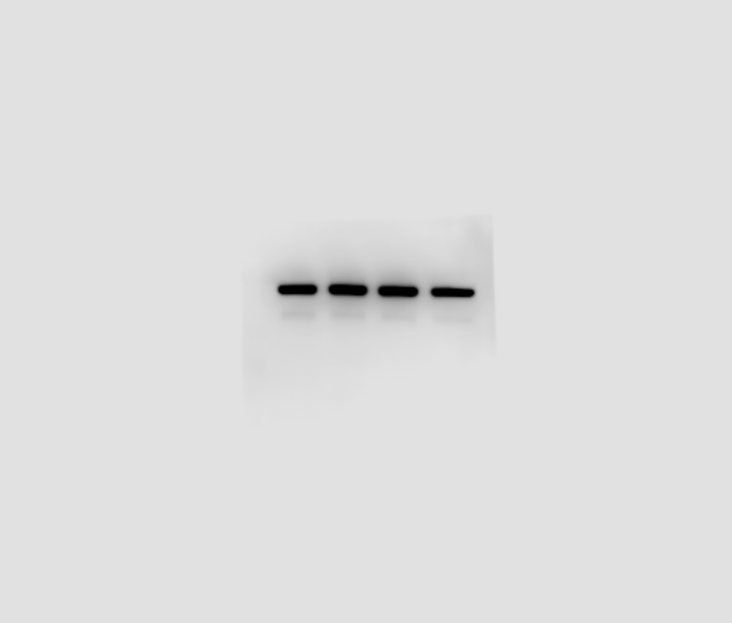 |

| Figure 5b  p-ERK  Primary antibody – CST, Cat# 9102  Titer – 1:1000 in 3% TBST | 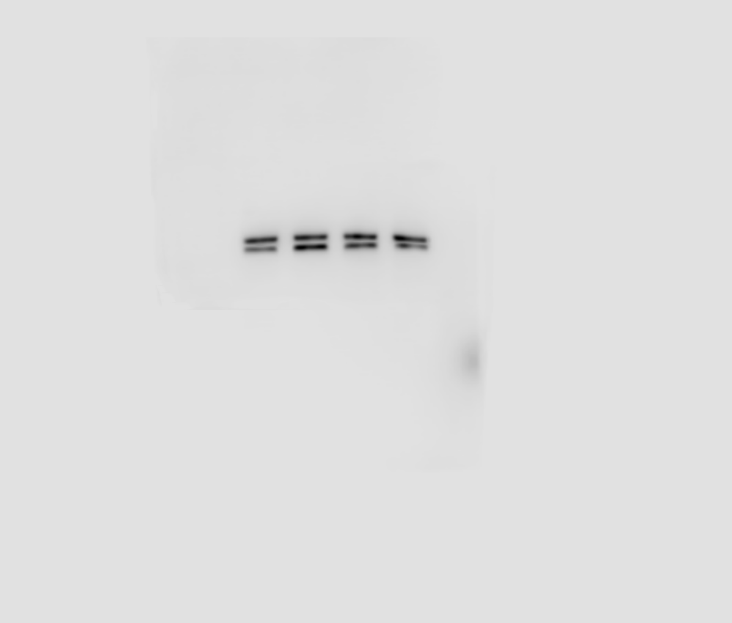 |
| --- | --- |
| Figure 5b  t-ERK  Primary antibody – CST, Cat# 9101  Titer – 1:1000 in 3% TBST | 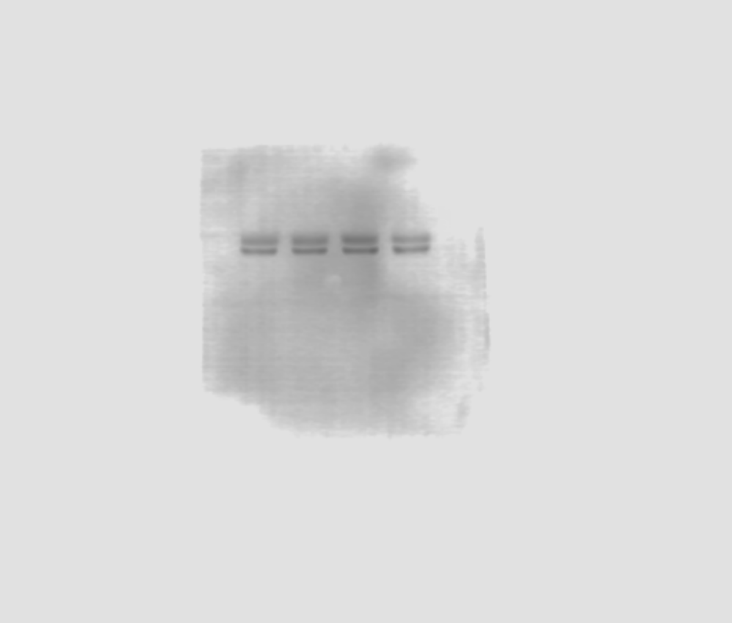 |
| Figure 5b  CD31  Primary antibody – abcam, Cat# ab28364  Titer – 1:1000 in 3% TBST | 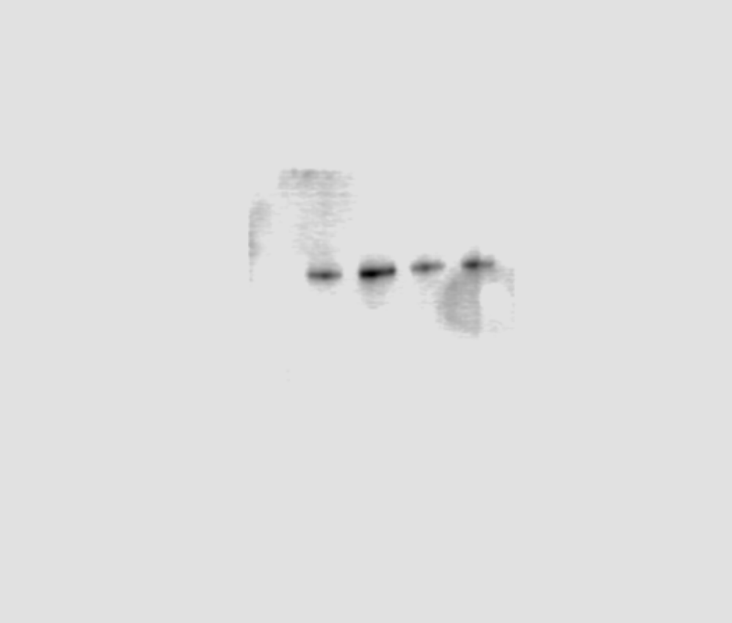 |

| Figure 5b  Beta actin  Primary antibody – Sigma, Cat# A5441  Titer – 1:5000 in 3% TBST | 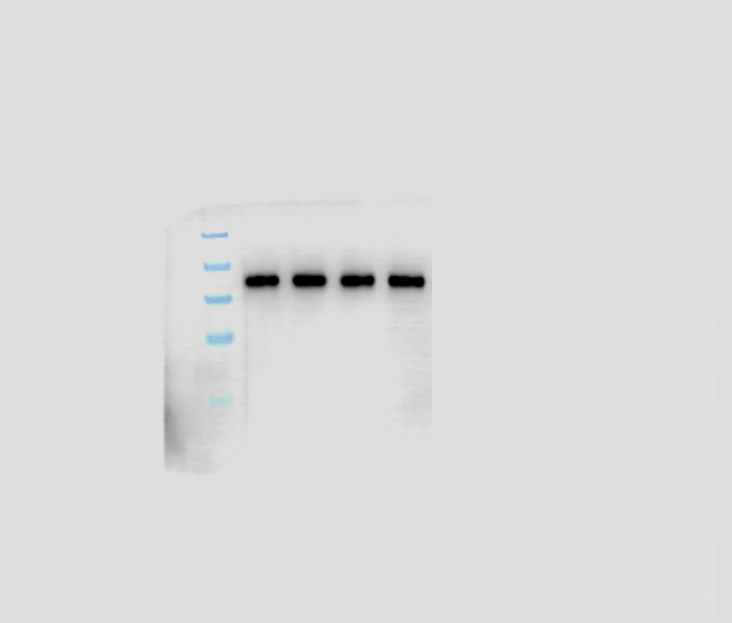 |
| --- | --- |
| Figure 6a  Apoptosis Western blot Cocktail  (Cleaved PARP, beta actin, procaspase3, cleaved caspase3)  Primary antibody – abcam, Cat# ab136812  Titer – 1:1000 in 3% TBST | 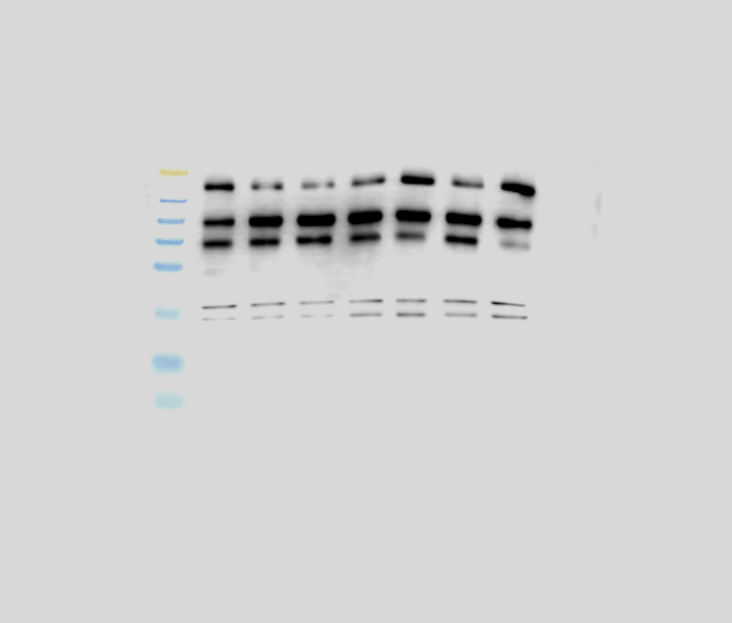 |
